# Supplementary material for: Highly Robust and Selective System for Water Pollutants Removal: How to Transform a Traditional Photocatalyst into a Highly Robust and Selective System for Water Pollutants Removal
Source: MDPI journal article supplement (doi:10.3390/nano9111509), 2019-10-23
Supplement: s1 [file s1]

Supplementary Materials

# Highly Robust and Selective System for Water Pollutants Removal: How to Transform a Traditional Photocatalyst into a Highly Robust and Selective System for Water Pollutants Removal

Olga Sacco, Vincenzo Vaiano, Christophe Daniel, Wanda Navarra and Vincenzo Venditto

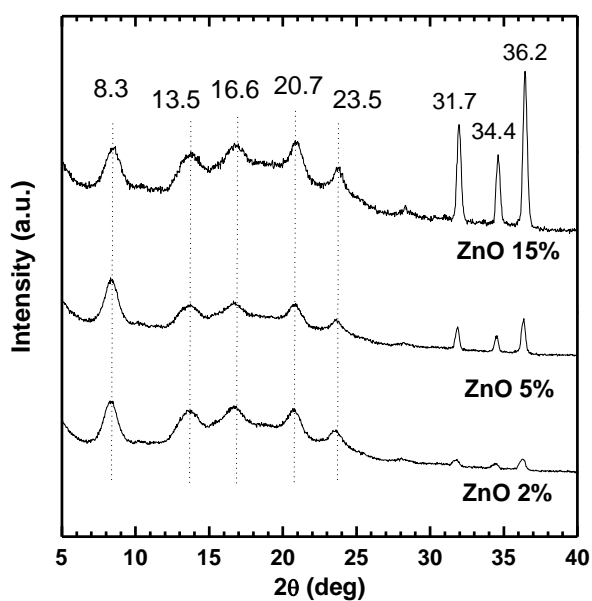

Figure S1. XRD patterns of ZnO/s-PS  $\delta$ -form aerogels containing 15, 5, and 2 wt% of ZnO.
